# Supplementary material for: Molecular layer deposited alucone thin films from long-chain organic precursors: from brittle to ductile mechanical characteristics
Source: Royal Society of Chemistry journal article supplement (doi:10.1039/d0dt02210a), 2020-01-01
Supplement: d0dt02210a1.pdf [file d0dt02210a1.pdf]

## Supplementary information

# Molecular layer deposited alucone thin films from long-chain organic precursors: from brittle to ductile mechanical characteristics

*Janne-Petteri Niemelä\**, *Nadia Rohbeck*, *Johann Michler* and *Ivo Utke*

\*[janne-petteri.niemelae@empa.ch](mailto:janne-petteri.niemelae@empa.ch)

Laboratory for Mechanics of Materials and Nanostructures

Empa - Swiss Federal Laboratories for Materials Science and Technology

Feuerwerkerstrasse 39, Thun CH-3602, Switzerland

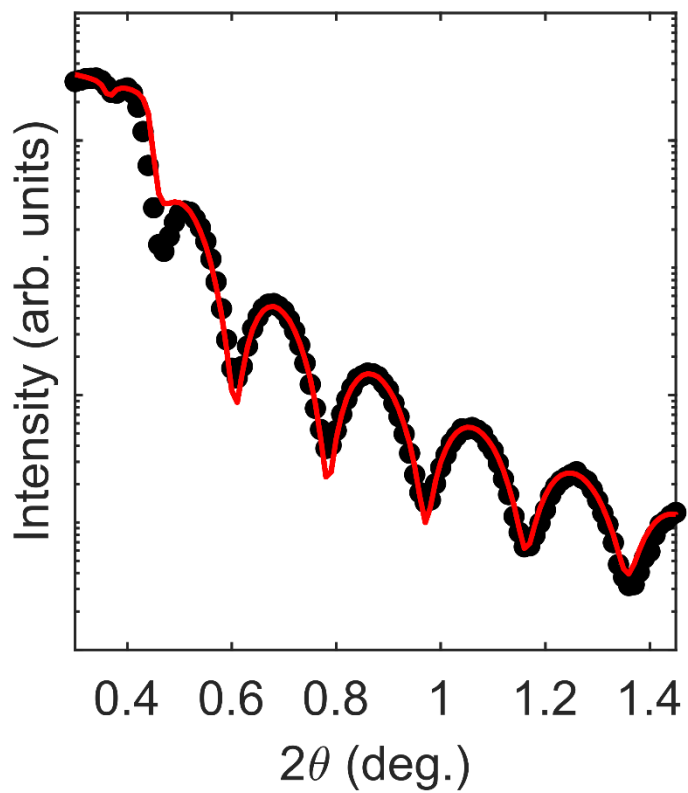

**Figure S1.** An example X-ray reflection pattern (solid markers) together with the corresponding fit (line) for a hybrid inorganic-organic film deposited through the TMA/DD route.

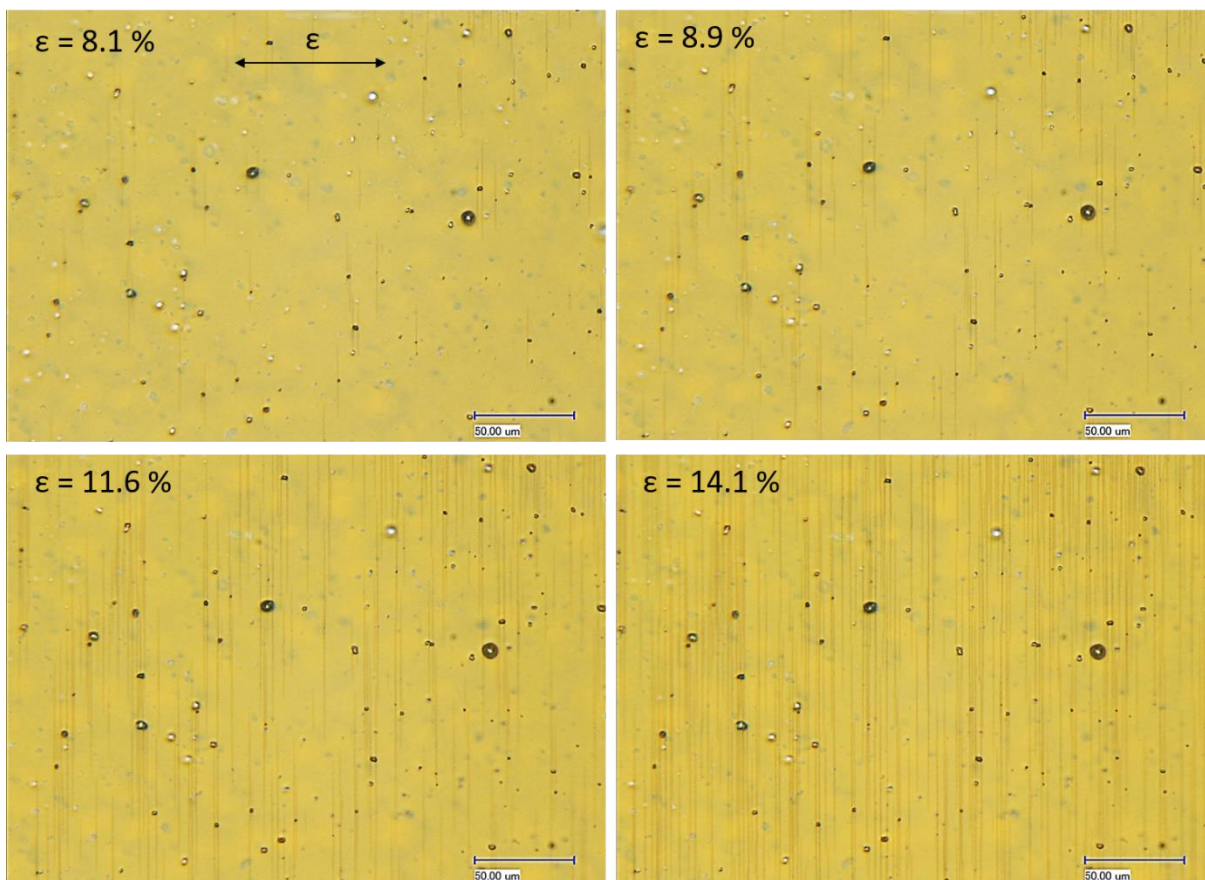

**Figure S2.** Optical micrographs of the film surface for various uniaxial tensile strain ( $\epsilon$ ) values as followed through the in-situ optical microscopy. The micrographs are for the hybrid inorganic-organic film deposited through the TMA/HD route.

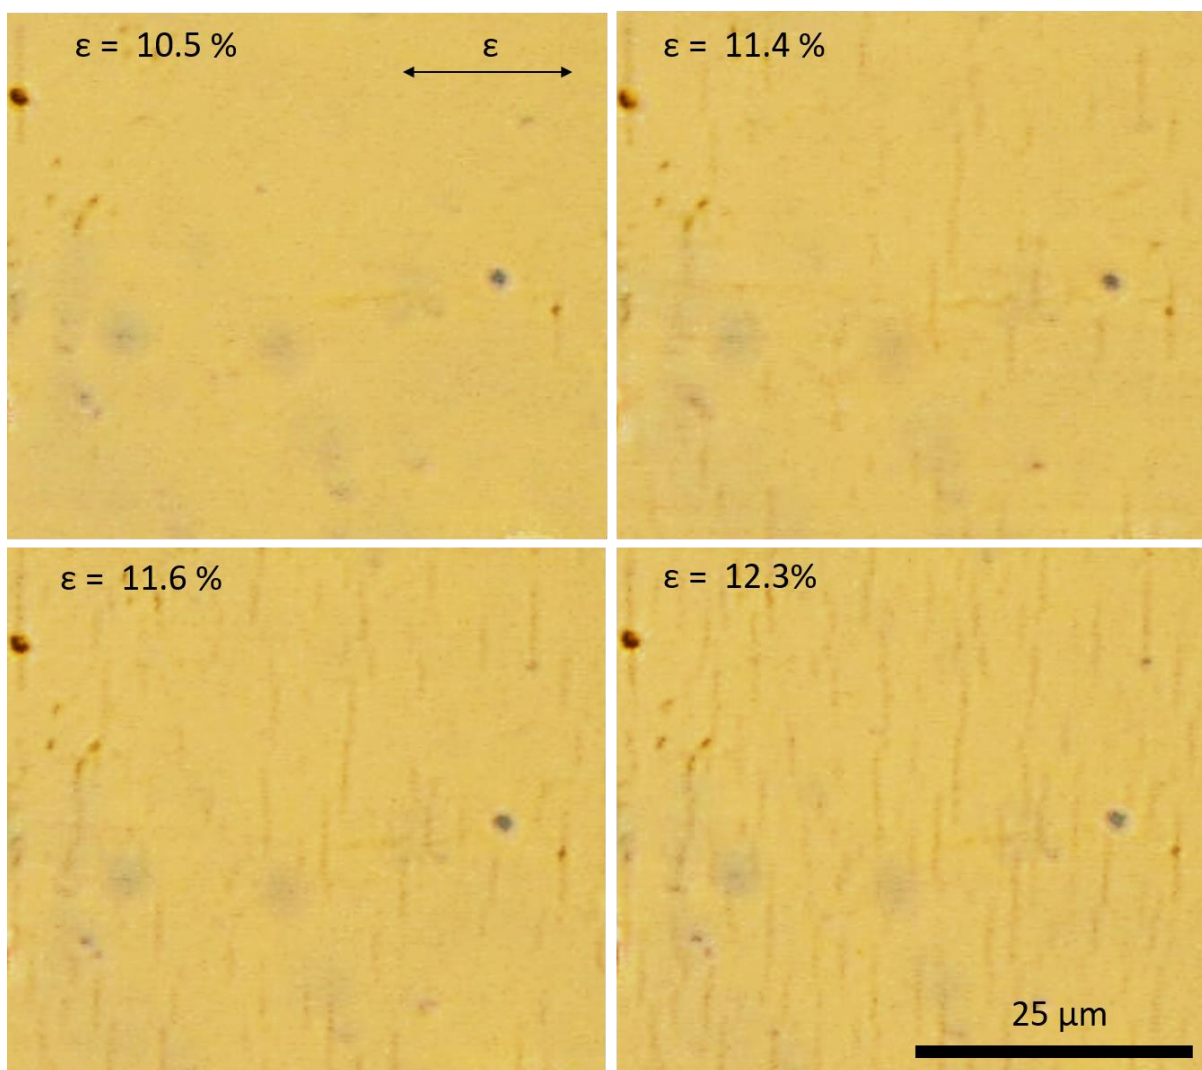

**Figure S3.** Optical micrographs of the film surface for various uniaxial tensile strain ( $\epsilon$ ) values as followed through the in-situ optical microscopy. The micrographs are for the hybrid inorganic-organic film deposited through the TMA/DD route.
